# Supplementary material
Source: publisher site journal article supplement (https://www.dovepress.com/get_supplementary_file.php?f=254477.xlsx)
Supplement: Supplementary file 1 [file get_supplementary_file.php]

## Sheet: Cross-sectional study
	Question\Author (Publish year)	Castillo, D. et al (2009) [24]	Mehuys, E. et al (2010) [25]	Verma, A. et al (2012) [27]	Tommelein, E. et al (2014) [33]	Castillo, D. et al (2015) [35]	Fathima, M. et al (2017) [40]	Castel-Branco, M.M. et al (2017) [42]	Heikkila, J. M. et al (2018) [43]	Fathima, M. et al (2019) [47]
	1. Were the criteria for inclusion in the sample clearly defined?	Yes	Yes	Yes	Yes	Yes	Yes	Yes	Yes	Yes
	2. Were the study subjects and the setting described in detail?	No	Yes	No	No	Yes	Yes	Yes	Yes	Yes
	3. Was the exposure measured in a valid and reliable way?	Yes	Yes	No	Yes	Yes	No	Yes	Yes	Yes
	4. Were objective, standard criteria used for measurement of the condition?	Yes	No	Not applicable	Not applicable	Yes	Yes	Yes	Yes	Yes
	5. Were confounding factors identified?	No	Yes	No	Yes	Yes	Yes	Yes	Yes	No
	6. Were strategies to deal with confounding factors stated?	No	No	No	Yes	Yes	No	No	Yes	No
	7. Were the outcomes measured in a valid and reliable way?	Yes	Yes	Yes	Yes	Yes	Yes	Yes	Yes	Yes
	8. Was appropriate statistical analysis used?	Yes	Yes	Yes	Yes	Yes	Yes	Yes	Yes	Yes
	Quality	Poor quality (5/8)	Fair quality (6/8)	Poor quality (4/8)	Fair quality (7/8)	Good quality (8/8)	Fair quality (6/8)	Fair quality (7/8)	Good quality (8/8)	Fair quality (6/8)

## Sheet: RCT
	Question\Author (Publish year)	Petkova, V. et al (2012) [29]	Tommelein, E. et al (2014) [32]	Davis, E. et al (2016) [39]	Klassing, H. M. et al (2018) [46]
	1. Was true randomization used for assignment of participants to treatment groups?	Yes	Yes	Yes	Yes
	2. Was allocation to treatment groups concealed?	Yes	Yes	Yes	Yes
	3. Were treatment groups similar at the baseline?	Yes	Yes	Yes	Yes
	4. Were participants blind to treatment assignment?	Yes	Yes	Unclear	Yes
	5. Were those delivering treatment blind to treatment assignment?	Unclear	No applicable	Unclear	Unclear
	6. Were outcomes assessors blind to treatment assignment?	Unclear	Unclear	Yes	Unclear
	7. Were treatment groups treated identically other than the intervention of interest?	Unclear	Unclear	Unclear	Unclear
	8. Was follow up complete and if not, were differences between groups in terms of their follow up adequately described and analyzed?	Yes	Yes	Yes	Yes
	9. Were participants analyzed in the groups to which they were randomized?	Yes	Yes	Yes	Yes
	10. Were outcomes measured in the same way for treatment groups?	Yes	Yes	Yes	Yes
	11. Were outcomes measured in a reliable way?	Yes	Yes	Yes	Yes
	12. Was appropriate statistical analysis used?	Yes	Yes	Yes	Yes
	13. Was the trial design appropriate, and any deviations from the standard RCT design (individual randomization, parallel groups) accounted for in the conduct and analysis of the trial?	Yes	Yes	Yes	Yes
	Quality	Fair quality (10/13)	Fair quality (11/13)	Fair quality (10/13)	Fair quality (10/13)

## Sheet: non-RCT
	Question\Author (Publish year)	Hammerlein, A. et al (2011) [26]	Fuller, L. et al (2012) [30]	Takemura, M. et al (2013) [31]	Wright, D. et al (2015) [36]	Apikoglu-Rabus, S. et al (2016) [38]	Detoni, K. B. et al (2017) [41]	Ruud, K. W. et al (2018) [44]	Alton, S. et al (2018) [45]
	1. Is it clear in the study what is the ‘cause’ and what is the ‘effect’ (i.e. there is no confusion about which variable comes first)?	Yes	Yes	Yes	Yes	Yes	Yes	Yes	Yes
	2. Were the participants included in any comparisons similar?	Yes	Yes	Yes	Yes	No	Yes	No	No
	3. Were the participants included in any comparisons receiving similar treatment/care, other than the exposure or intervention of interest?	Yes	Yes	Yes	Yes	Yes	Yes	Yes	Yes
	4. Was there a control group?	No	No	No	No	No	No	No	No
	5. Were there multiple measurements of the outcome both pre and post the intervention/exposure?	Yes	Yes	Yes	Yes	Yes	Yes	No	Yes
	6. Was follow up complete and if not, were differences between groups in terms of their follow up adequately described and analyzed?	No	Yes	No	No applicable	No	Yes	No applicable	Yes
	7. Were the outcomes of participants included in any comparisons measured in the same way?	Yes	Yes	Yes	Yes	Yes	Yes	No	Yes
	8. Were outcomes measured in a reliable way?	Yes	Yes	Yes	Yes	Yes	Yes	Yes	Yes
	9. Was appropriate statistical analysis used?	Yes	Yes	Yes	Yes	Yes	Yes	Yes	Yes
	Quality	Fair quality (7/9)	Fair quality (8/9)	Fair quality (7/9)	Fair quality (8/9)	Poor quality (6/9)	Fair quality (8/9)	Poor quality (5/9)	Fair quality (7/9)

## Sheet: case series
	Question\Author (Publish year)	Beauchesne, M. F. et al (2012) [28]	Bouwmeester, C. et al (2015) [37]
	1. Were there clear criteria for inclusion in the case series?	Yes	Yes
	2. Was the condition measured in a standard, reliable way for all participants included in the case series?	No	Yes
	3. Were valid methods used for identification of the condition for all participants included in the case series?	No	Not applicable
	4. Did the case series have consecutive inclusion of participants?	No	Yes
	5. Did the case series have complete inclusion of participants?	No	Yes
	6. Was there clear reporting of the demographics of the participants in the study?	No	Yes
	7. Was there clear reporting of clinical information of the participants?	No	Not applicable
	8. Were the outcomes or follow up results of cases clearly reported?	Yes	Yes
	9. Was there clear reporting of the presenting site(s)/clinic(s) demographic information?	Yes	No
	10. Was statistical analysis appropriate?	Yes	Yes
	Quality	Poor quality (4/10)	Fair quality (9/10)

## Sheet: cohort study
	Question\Author (Publish year)	Ottenbros, S. et al (2014) [34]
	1.Were the two groups similar and recruited from the same population?	Yes
	2. Were the exposures measured similarly to assign people	Yes
	to both exposed and unexposed groups?	Yes
	3. Was the exposure measured in a valid and reliable way?	Yes
	4. Were confounding factors identified?	Yes
	5. Were strategies to deal with confounding factors stated?	Yes
	6. Were the groups/participants free of the outcome at the start of the study (or at the moment of exposure)?	Unclear
	7. Were the outcomes measured in a valid and reliable way?	Yes
	8. Was the follow up time reported and sufficient to be long enough for outcomes to occur?	Yes
	9. Was follow up complete, and if not, were the reasons to loss to follow up described and explored?	Not applicable
	10. Were strategies to address incomplete follow up utilized?	Not applicable
	11. Was appropriate statistical analysis used?	Yes
	Quality of study	Fair quality (10/11)

## Sheet: interview
	Supplementary material 1
	Question\Author (Publish year)	Hesso, I. et al (2019) [48]
	1. Is there congruity between the stated philosophical perspective and the research methodology?	Yes
	2. Is there congruity between the research methodology and the research question or objectives?	Yes
	3. Is there congruity between the research methodology and the methods used to collect data?	Yes
	4. Is there congruity between the research methodology and the representation and analysis of data?	Yes
	5. Is there congruity between the research methodology and the interpretation of results?	Yes
	6. Is there a statement locating the researcher culturally or theoretically?	Unclear
	7. Is the influence of the researcher on the research, and vice- versa, addressed?	Yes
	8. Are participants, and their voices, adequately represented?	Yes
	9. Is the research ethical according to current criteria or, for recent studies, and is there evidence of ethical approval by an appropriate body?	Yes
	10. Do the conclusions drawn in the research report flow from the analysis, or interpretation, of the data?	Yes
	Quality of study	Fair quality (9/10)
